# Supplementary material for: Endothelin-1 is associated with mortality that can be attenuated with high intensity statin therapy in patients with stable coronary artery disease
Source: PubMed Central journal article supplement (PMC10287654; doi:10.1038/s43856-023-00322-9), 2023-06-22
Supplement: 43856_2023_322_MOESM2_ESM.pdf [file 43856_2023_322_MOESM2_ESM.pdf]

## Supplementary Information

### **Endothelin-1 is associated with mortality that can be attenuated with statin therapy in patients with stable coronary artery disease**

Ruizhu Lin<sup>1</sup>, Juhani Junntila<sup>1,2,3</sup>, Jarkko Piuholta<sup>1</sup>, E. Samuli Lepojärvi<sup>1</sup>,  
Johanna Magga<sup>1,3</sup>, Antti M. Kiviniemi<sup>1</sup>, Juha Perkiömäki<sup>1</sup>, Heikki Huikuri<sup>1</sup>,  
Olavi Ukkola<sup>1</sup>, Mikko Tulppo<sup>1</sup>, Risto Kerkelä<sup>1,2,3</sup>

1 Research Unit of Biomedicine and Internal Medicine, University of Oulu, Oulu, Finland

2 Medical Research Centre Oulu, Oulu University Hospital and University of Oulu, Oulu, Finland

3 Biocenter Oulu, University of Oulu, Oulu, Finland.

Figure S1

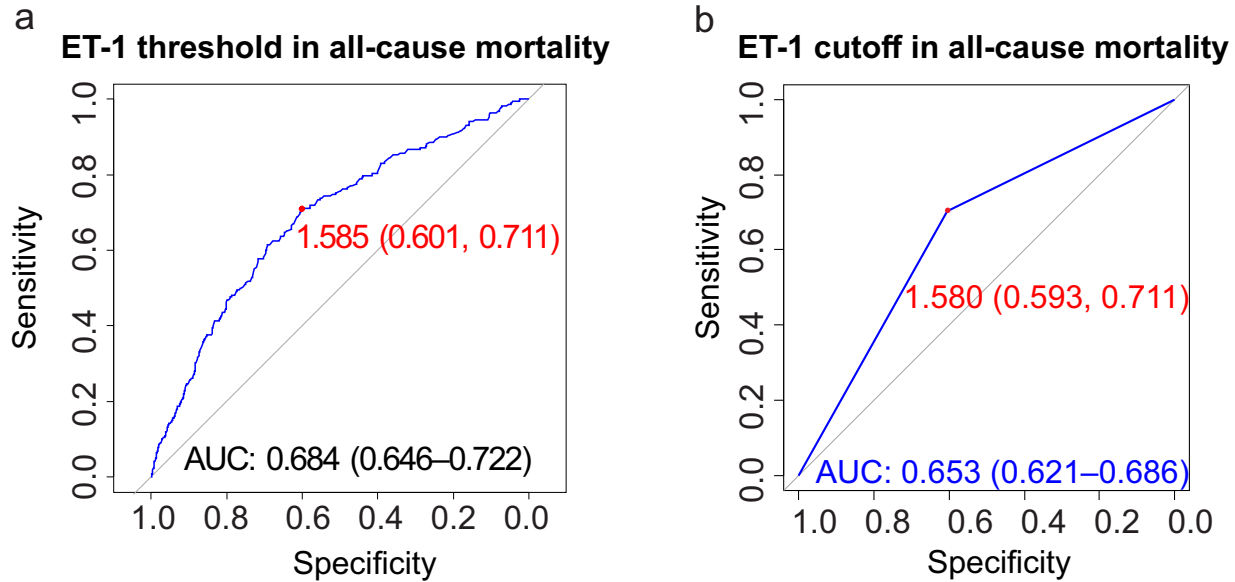

Figure S1. ROC curves for ET-1 to discriminate all-cause mortality. Receiver-operating characteristic (ROC) curve analysis was conducted to obtain the cutoff value of ET-1 for optimal sensitivity and specificity. (a) ET-1 was used as continuous variable to predict all-cause mortality, and the estimated optimal threshold of concentration was 1.585 pg/ml (AUC=0.684 [95% CI, 0.646–0.722], specificity=0.601, sensitivity=0.711). (b) ET-1 was used as cutoff of 1.580 pg/ml (AUC=0.653 [95% CI, 0.621–0.686], specificity=0.593, sensitivity=0.711). (a-b) n=1945 biologically independent samples. ET-1, endothelin-1; AUC, area under the curve

Figure S2

All-cause mortality in high ET-1

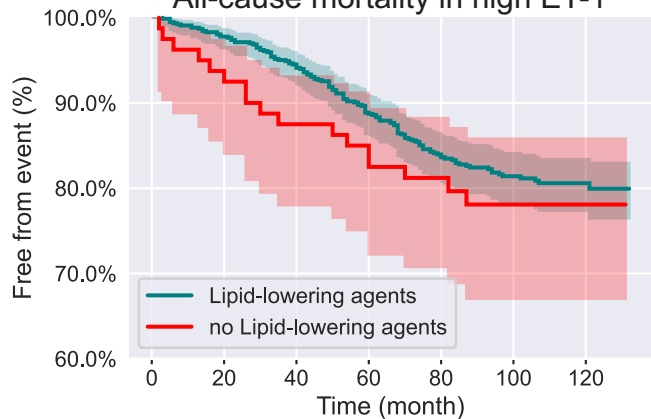

|                          |     |     |     |     |     |     |     |
|--------------------------|-----|-----|-----|-----|-----|-----|-----|
| no Lipid-lowering agents |     |     |     |     |     |     |     |
| At risk                  | 80  | 74  | 70  | 66  | 52  | 27  | 12  |
| Events                   | 0   | 6   | 10  | 14  | 15  | 17  | 17  |
| Lipid-lowering agents    |     |     |     |     |     |     |     |
| At risk                  | 765 | 748 | 720 | 666 | 510 | 330 | 123 |
| Events                   | 0   | 17  | 45  | 86  | 122 | 134 | 137 |

All-cause mortality in high ET-1

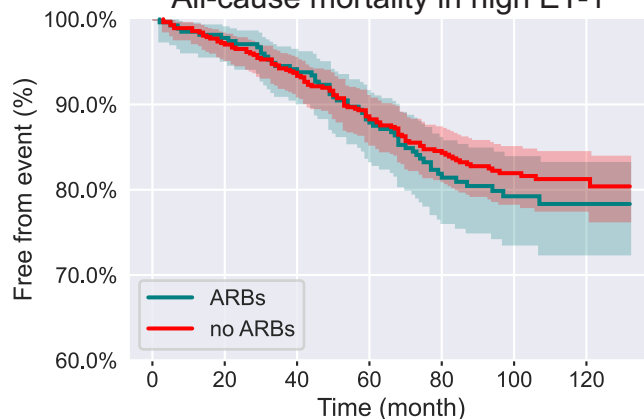

|         |     |     |     |     |     |     |     |
|---------|-----|-----|-----|-----|-----|-----|-----|
| no ARBs |     |     |     |     |     |     |     |
| At risk | 572 | 555 | 534 | 497 | 389 | 251 | 95  |
| Events  | 0   | 17  | 38  | 67  | 88  | 98  | 100 |
| ARBs    |     |     |     |     |     |     |     |
| At risk | 273 | 267 | 256 | 235 | 173 | 106 | 40  |
| Events  | 0   | 6   | 17  | 33  | 49  | 53  | 54  |

All-cause mortality in high ET-1

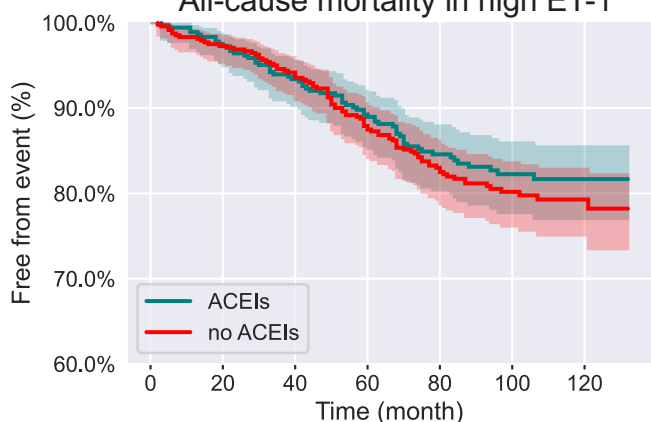

|          |     |     |     |     |     |     |    |
|----------|-----|-----|-----|-----|-----|-----|----|
| no ACEIs |     |     |     |     |     |     |    |
| At risk  | 481 | 468 | 450 | 413 | 319 | 196 | 74 |
| Events   | 0   | 13  | 31  | 60  | 82  | 90  | 92 |
| ACEIs    |     |     |     |     |     |     |    |
| At risk  | 364 | 354 | 340 | 319 | 243 | 161 | 61 |
| Events   | 0   | 10  | 24  | 40  | 55  | 61  | 62 |

All-cause mortality in high ET-1

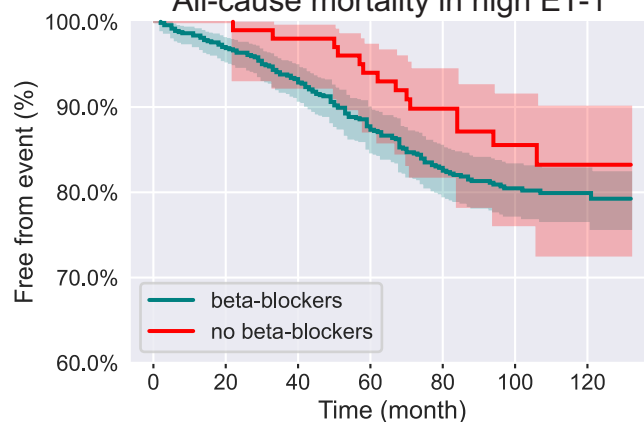

|                  |     |     |     |     |     |     |     |
|------------------|-----|-----|-----|-----|-----|-----|-----|
| no beta-blockers |     |     |     |     |     |     |     |
| At risk          | 101 | 101 | 99  | 93  | 70  | 43  | 15  |
| Events           | 0   | 0   | 2   | 6   | 10  | 13  | 14  |
| beta-blockers    |     |     |     |     |     |     |     |
| At risk          | 744 | 721 | 691 | 639 | 492 | 314 | 120 |
| Events           | 0   | 23  | 53  | 94  | 127 | 138 | 140 |

All-cause mortality in high ET-1

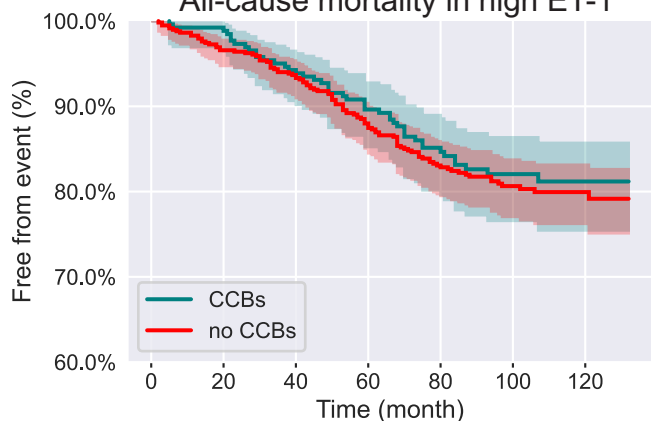

|         |     |     |     |     |     |     |     |
|---------|-----|-----|-----|-----|-----|-----|-----|
| no CCBs |     |     |     |     |     |     |     |
| At risk | 584 | 564 | 545 | 503 | 389 | 242 | 102 |
| Events  | 0   | 20  | 39  | 73  | 98  | 107 | 109 |
| CCBs    |     |     |     |     |     |     |     |
| At risk | 261 | 258 | 245 | 229 | 173 | 115 | 33  |
| Events  | 0   | 3   | 16  | 27  | 39  | 44  | 45  |

All-cause mortality in high ET-1

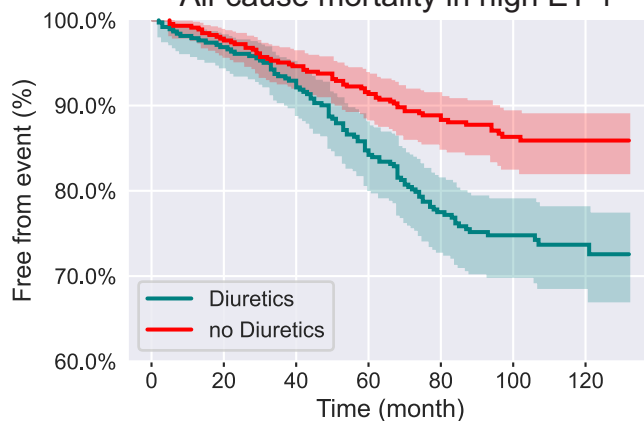

|              |     |     |     |     |     |     |    |
|--------------|-----|-----|-----|-----|-----|-----|----|
| no Diuretics |     |     |     |     |     |     |    |
| At risk      | 464 | 453 | 439 | 415 | 321 | 203 | 69 |
| Events       | 0   | 11  | 25  | 40  | 53  | 59  | 60 |
| Diuretics    |     |     |     |     |     |     |    |
| At risk      | 381 | 369 | 351 | 317 | 241 | 154 | 66 |
| Events       | 0   | 12  | 30  | 60  | 84  | 92  | 94 |

Figure S2. Kaplan-Meier curves for primary endpoint in high ET-1 group upon various medication. Shown are rate of freedom from all-cause mortality over follow-up time. Chi-square and p value were derived from log-rank test between low and high ET-1 groups. Shadows indicated confident interval of estimates. ARBs, Angiotensin II receptor blocker; ACEIs, Angiotensin-Converting Enzyme Inhibitors ; beta-blockers, beta-adrenergic blockers; CCBs, calcium channel blockers; ET-1, endothelin-1.

Figure S3

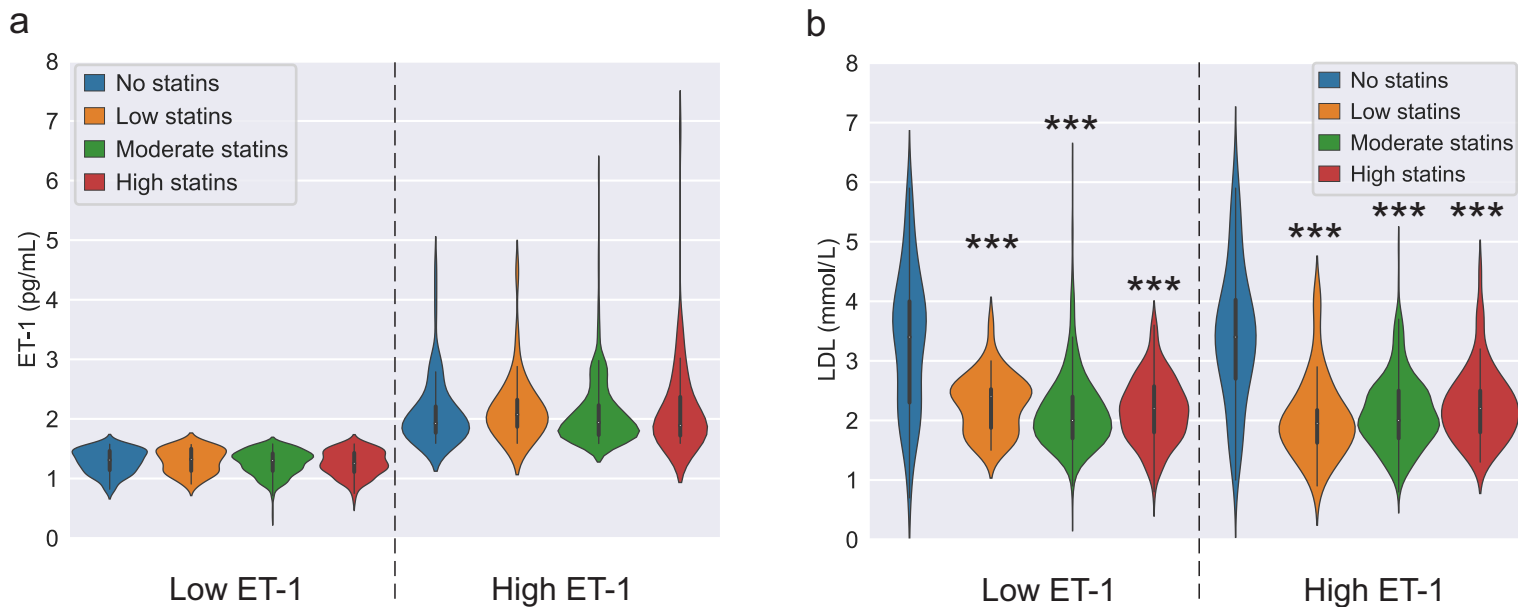

Figure S3. Analysis for circulating ET-1 and LDL concentration in subgroups.

Shown are violin plots of circulating ET-1 (a) and LDL (b) levels according to ET-1 level and statin use. Inside is a miniature of boxplot. In low ET-1 group, No statins: n=87, Low statins: n=36, Moderate statins: n=654, High statins: n=138; In high ET-1 group, No statins: n=80, Low statins: n=38, Moderate statins: n=462, High statins: n=69 biologically independent samples. \*\*\*p<0.001 vs No statins group. Wilcoxon rank-sum test was used for statistical testing due to non-normality. ET-1, endothelin-1; LDL, Low-density lipoprotein. The vertical dash lines were used to separate low and high ET-1 groups.

Figure S4

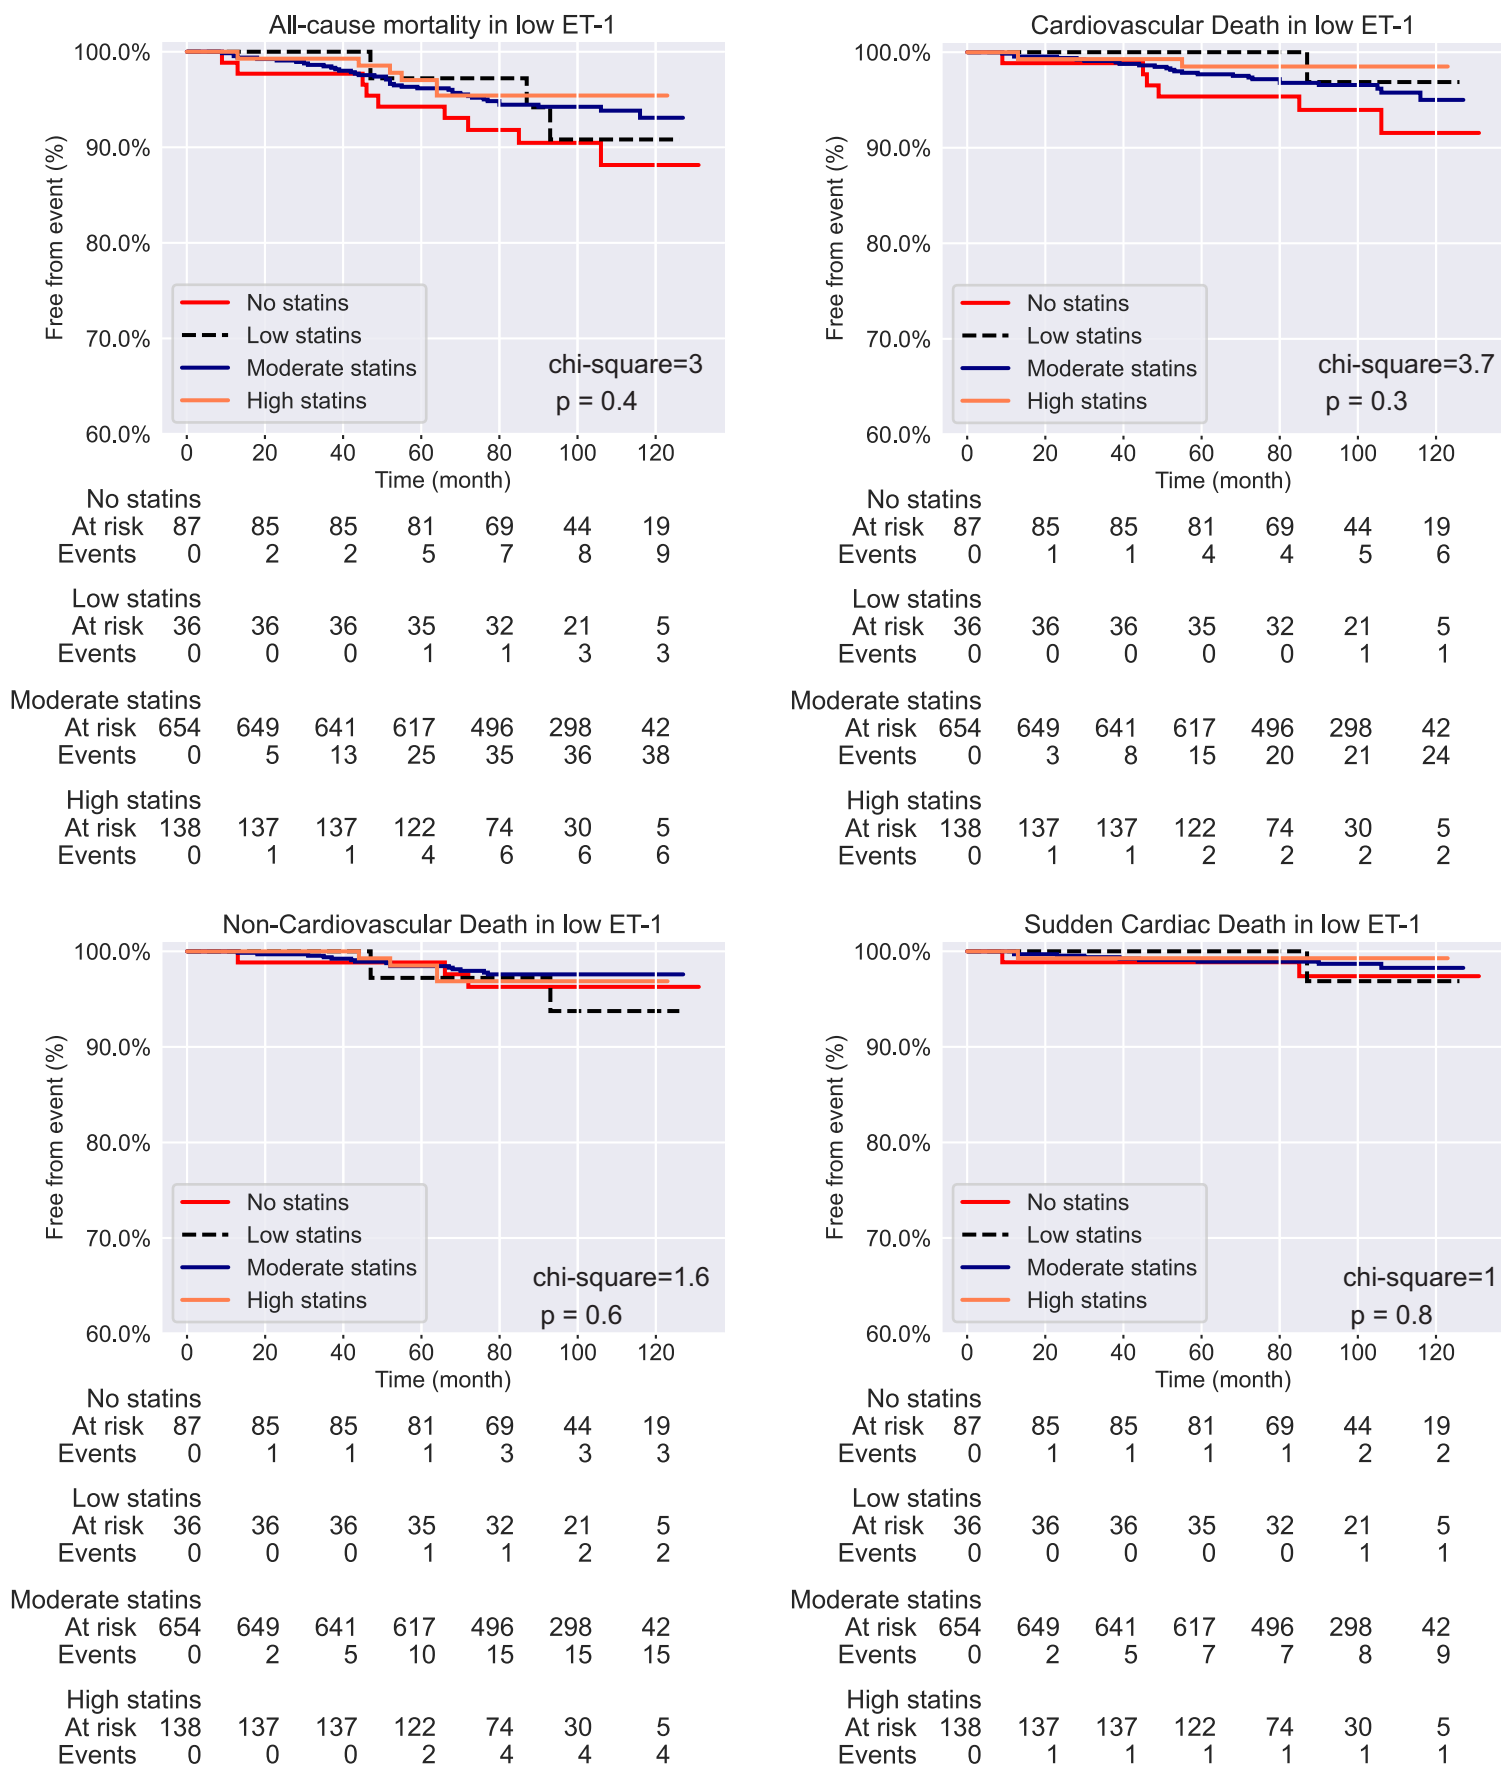

Figure S4. Kaplan-Meier curves for endpoint events in low ET-1 group according to statin use. Shown are rate of freedom from all-cause mortality, cardiovascular death, non-cardiovascular death and sudden cardiac death over follow-up time. Chi-square and p value were derived from log-rank test between statin groups. ET-1, endothelin-1.

**Table S1. Baseline characteristics of patients in ET-1 quartiles**

|                                | Overall<br>1945       | Q1<br>494             | Q2<br>479             | Q3<br>486             | Q4<br>486             | p       |
|--------------------------------|-----------------------|-----------------------|-----------------------|-----------------------|-----------------------|---------|
| N                              |                       |                       |                       |                       |                       |         |
| Age (year)                     | 67 [61, 73]           | 64 [59, 70]           | 67 [61, 72]           | 69 [63, 74]           | 70 [64, 75]           | <0.0001 |
| T2D (%)                        | 833 (42.8)            | 106 (21.5)            | 175 (36.5)            | 243 (50.0)            | 309 (63.6)            | <0.0001 |
| Sex (%) (female)               | 618 (31.8)            | 125 (25.3)            | 143 (29.9)            | 160 (32.9)            | 190 (39.1)            | <0.0001 |
| LVEF (%)                       | 65.50 [59.95, 70.10]  | 65.40 [60.35, 70.30]  | 66.00 [60.82, 69.88]  | 65.10 [59.08, 69.60]  | 65.20 [58.10, 71.00]  | 0.3552  |
| BMI (kg/m <sup>2</sup> )       | 28.00 [25.00, 31.00]  | 27.00 [25.00, 29.00]  | 28.00 [25.00, 31.00]  | 28.00 [25.00, 31.00]  | 29.00 [26.00, 33.00]  | <0.0001 |
| sysBP (mm Hg)                  | 145 [129, 162]        | 138.50 [123.25, 154]  | 146 [129, 164]        | 149 [134, 163]        | 147 [131, 163.75]     | <0.0001 |
| diaBP (mm Hg)                  | 77 [70, 84]           | 76 [69, 83]           | 77 [71, 84]           | 78 [70, 85]           | 77 [70, 85]           | 0.0090  |
| BNP (pg/mL)                    | 50.00 [25.00, 93.00]  | 38.00 [20.00, 73.00]  | 49.00 [24.00, 86.00]  | 51.00 [26.00, 99.50]  | 62.50 [31.25, 139.50] | <0.0001 |
| Creatinine clearance (mL/min)  | 87.92 [70.38, 112.39] | 90.84 [74.39, 112.99] | 89.12 [73.62, 114.52] | 83.63 [66.77, 109.82] | 86.41 [66.45, 109.72] | 0.0007  |
| Insulin (mIU / L)              | 11.80 [7.30, 18.70]   | 9.90 [6.60, 14.30]    | 11.40 [7.20, 17.85]   | 12.40 [7.82, 19.42]   | 14.40 [8.40, 22.50]   | <0.0001 |
| GHbA1C (%)                     | 6.10 [5.70, 6.60]     | 5.90 [5.60, 6.30]     | 6.00 [5.70, 6.40]     | 6.20 [5.80, 6.80]     | 6.50 [5.90, 7.20]     | <0.0001 |
| Total cholesterol (mmol/L)     | 3.80 [3.40, 4.40]     | 3.80 [3.40, 4.40]     | 3.80 [3.40, 4.30]     | 3.90 [3.40, 4.50]     | 3.80 [3.40, 4.40]     | 0.2918  |
| HDL (mmol/L)                   | 1.23 [1.03, 1.44]     | 1.25 [1.05, 1.50]     | 1.23 [1.05, 1.44]     | 1.21 [1.03, 1.44]     | 1.20 [1.01, 1.40]     | 0.0187  |
| LDL (mmol/L)                   | 2.10 [1.80, 2.60]     | 2.10 [1.80, 2.60]     | 2.10 [1.80, 2.60]     | 2.20 [1.80, 2.60]     | 2.10 [1.80, 2.60]     | 0.3977  |
| Triglyceride (mmol/L)          | 1.21 [0.90, 1.67]     | 1.08 [0.82, 1.42]     | 1.18 [0.88, 1.62]     | 1.28 [0.96, 1.76]     | 1.34 [1.01, 1.79]     | <0.0001 |
| Resting heart rate (beats/min) | 59 [53, 66]           | 58 [52, 63]           | 58 [53, 64]           | 60 [54, 67]           | 62 [55, 72]           | <0.0001 |
| <b>NYHA (%)</b>                |                       |                       |                       |                       |                       |         |
| NYHA Class I                   | 853 (44.3)            | 142 (29.0)            | 191 (40.6)            | 243 (50.2)            | 277 (57.5)            |         |
| NYHA Class II                  | 69 (3.6)              | 15 (3.1)              | 15 (3.2)              | 12 (2.4)              | 27 (5.6)              |         |
| <b>Medication (%)</b>          |                       |                       |                       |                       |                       |         |
| ARBs                           | 558 (28.7)            | 104 (21.1)            | 148 (31.0)            | 135 (27.8)            | 171 (35.3)            | <0.0001 |
| ACEIs                          | 783 (40.3)            | 179 (36.2)            | 183 (38.3)            | 224 (46.1)            | 197 (40.6)            | 0.0118  |
| CCBs                           | 474 (24.4)            | 69 (14.0)             | 106 (22.2)            | 139 (28.6)            | 160 (32.9)            | <0.0001 |
| Diuretics                      | 666 (34.3)            | 90 (18.2)             | 148 (31.0)            | 178 (36.6)            | 250 (51.4)            | <0.0001 |
| β-blockers                     | 1704 (87.7)           | 424 (85.8)            | 421 (88.1)            | 438 (90.1)            | 421 (86.6)            | 0.1862  |
| Lipid-lowering therapy         | 1777 (91.4)           | 458 (92.7)            | 439 (91.8)            | 439 (90.3)            | 441 (90.7)            | 0.5358  |
| <b>History (%)</b>             |                       |                       |                       |                       |                       |         |
| Prior MI                       | 929 (47.8)            | 247 (50.0)            | 216 (45.2)            | 237 (48.8)            | 229 (47.1)            | 0.4687  |
| Prior PCI or CABG              | 1544 (79.6)           | 394 (80.1)            | 399 (83.5)            | 368 (76.2)            | 383 (78.8)            | 0.0432  |
| Smoking                        | 167 (8.6)             | 26 (5.3)              | 34 (7.1)              | 44 (9.1)              | 63 (13.0)             | 0.0001  |
| <b>Death (%)</b>               |                       |                       |                       |                       |                       |         |
| All-cause mortality            | 218 (11.2)            | 26 (5.3)              | 30 (6.3)              | 57 (11.7)             | 105 (21.6)            | <0.0001 |
| Cardiovascular Death           | 116 (6.0)             | 13 (2.6)              | 17 (3.5)              | 33 (6.8)              | 53 (10.9)             | <0.0001 |
| non-Cardiovascular Death       | 102 (5.2)             | 13 (2.6)              | 14 (2.9)              | 23 (4.7)              | 52 (10.7)             | <0.0001 |
| Sudden Cardiac Death           | 50 (2.6)              | 6 (1.2)               | 7 (1.5)               | 16 (3.3)              | 21 (4.3)              | <0.0001 |

Values were expressed as mean ± SD, median [IQR], or counts (%) as appropriate. T2D, type 2 diabetes; LVEF, left ventricular ejection fraction; BMI, body mass index; sysBP, systolic blood pressure; diaBP, diastolic blood pressure; BNP, B-type natriuretic peptide ; %GHbA1C, percentage of glycated hemoglobin A1c; HDL, high-density lipoprotein; LDL, low-density lipoprotein; NYHA, New York Heart Association Classification; ARBs, Angiotensin II receptor blocker; ACEIs, Angiotensin-Converting Enzyme Inhibitors ; β-blockers, β-adrenergic blockers; CCBs, calcium channel blockers; MI, myocardial infarction; CABG, coronary artery bypass surgery; PCI, percutaneous coronary intervention. ET-1, endothelin-1.

**Table S2. Baseline characteristics of patients with various statin dosage in high or low ET-1 group**

|                                | Overall               | Low ET-1              |                       |                       |                        | high ET-1               |                       |                       |                       | p (low vs high ET-1) |
|--------------------------------|-----------------------|-----------------------|-----------------------|-----------------------|------------------------|-------------------------|-----------------------|-----------------------|-----------------------|----------------------|
|                                |                       | no statin             | low statins           | moderate statins      | high statins           | no statin               | low statins           | moderate statins      | high statins          |                      |
| N                              | 1564                  | 87                    | 36                    | 654                   | 138                    | 80                      | 38                    | 462                   | 69                    |                      |
| Age (year)                     | 68 [62, 74]           | 66 [60, 74]           | 69.50 [65.75, 75.25]  | 66 [61, 72]           | 63 [54.25, 67]         | 70.50 [64, 75]          | 74 [69, 76.75]        | 70 [64, 76]           | 67 [61, 74]           | <0.0001              |
| T2D (%)                        | 605 (38.7)            | 26 (29.9)             | 14 (38.9)             | 175 (26.8)            | 45 (32.6)              | 49 (61.3)               | 19 (50.0)             | 236 (51.1)            | 41 (59.4)             | <0.0001              |
| Sex (%) (female)               | 487 (31.1)            | 28 (32.2)             | 14 (38.9)             | 172 (26.3)            | 36 (26.1)              | 30 (37.5)               | 17 (44.7)             | 162 (35.1)            | 28 (40.6)             | 0.0001               |
| LVEF (%)                       | 65.60 [60.02, 70.07]  | 65.60 [61.40, 70.53]  | 65.05 [60.22, 70.90]  | 65.88 [60.90, 70.11]  | 64.80 [60.30, 67.80]   | 64.25 [57.48, 71.10]    | 65.90 [58.50, 71.22]  | 65.70 [59.20, 70.00]  | 64.40 [58.00, 69.50]  | 0.4235               |
| BMI (kg/m <sup>2</sup> )       | 27.00 [25.00, 30.00]  | 27.00 [24.74, 30.50]  | 26.00 [24.00, 29.00]  | 27.00 [25.00, 29.00]  | 27.00 [25.00, 30.00]   | 28.00 [24.00, 32.00]    | 28.20 [24.25, 30.75]  | 28.00 [26.00, 32.00]  | 29.00 [26.00, 32.00]  | <0.0001              |
| sysBP (mm Hg)                  | 145 [129, 162]        | 145 [125, 164]        | 152.50 [132, 164]     | 144 [128, 159]        | 135 [123, 153]         | 150.50 [134.75, 168.75] | 135 [127.25, 160]     | 148 [133, 165]        | 142 [128, 153]        | 0.0001               |
| diaBP (mm Hg)                  | 76 [70, 84]           | 75 [69, 84]           | 78 [73.75, 85]        | 76 [70, 83]           | 77 [70, 83]            | 77 [71.75, 86]          | 72.50 [68, 80.75]     | 77 [70, 85.75]        | 74 [69, 81]           | 0.2833               |
| BNP (pg/mL)                    | 50.50 [25.00, 97.00]  | 39.00 [18.50, 86.00]  | 43.50 [21.25, 86.75]  | 48.50 [25.00, 83.75]  | 37.00 [17.25, 76.25]   | 60.50 [33.50, 139.75]   | 84.50 [39.25, 143.25] | 58.00 [29.00, 123.00] | 59.00 [29.00, 132.00] | <0.0001              |
| Creatinine clearance (mL/min)  | 86.41 [69.40, 109.93] | 92.25 [75.14, 111.39] | 86.42 [72.97, 100.82] | 86.10 [70.17, 109.83] | 101.87 [82.55, 126.73] | 86.12 [65.96, 109.63]   | 77.53 [65.84, 96.30]  | 81.81 [63.72, 105.68] | 95.05 [68.95, 119.03] | 0.0001               |
| Insulin (mIU / L)              | 11.30 [7.20, 18.00]   | 9.20 [5.55, 14.90]    | 10.95 [6.00, 14.82]   | 9.90 [6.90, 15.60]    | 12.30 [7.40, 19.55]    | 12.90 [7.30, 23.85]     | 11.65 [6.35, 21.23]   | 12.75 [7.80, 20.28]   | 14.20 [8.95, 23.12]   | <0.0001              |
| GHbA1C (%)                     | 6.00 [5.70, 6.50]     | 5.90 [5.60, 6.40]     | 6.05 [5.80, 6.43]     | 5.90 [5.60, 6.30]     | 5.95 [5.62, 6.30]      | 6.35 [5.97, 6.98]       | 6.20 [5.70, 6.97]     | 6.20 [5.80, 6.90]     | 6.10 [5.90, 6.60]     | <0.0001              |
| Total cholesterol (mmol/L)     | 3.80 [3.40, 4.40]     | 5.10 [4.20, 5.95]     | 3.90 [3.70, 4.20]     | 3.70 [3.30, 4.20]     | 3.90 [3.40, 4.30]      | 5.20 [4.50, 5.73]       | 3.65 [3.35, 4.27]     | 3.70 [3.30, 4.20]     | 3.90 [3.50, 4.40]     | <b>0.4865</b>        |
| HDL (mmol/L)                   | 1.24 [1.04, 1.46]     | 1.25 [1.11, 1.54]     | 1.25 [1.05, 1.45]     | 1.25 [1.06, 1.47]     | 1.19 [1.00, 1.43]      | 1.25 [1.02, 1.45]       | 1.27 [1.12, 1.50]     | 1.23 [1.02, 1.43]     | 1.11 [0.97, 1.35]     | <b>0.0472</b>        |
| LDL (mmol/L)                   | 2.10 [1.80, 2.60]     | 3.40 [2.30, 4.00]     | 2.40 [1.87, 2.52]     | 2.00 [1.70, 2.40]     | 2.20 [1.80, 2.58]      | 3.40 [2.70, 4.03]       | 1.95 [1.63, 2.18]     | 2.00 [1.70, 2.50]     | 2.20 [1.80, 2.50]     | <b>0.7366</b>        |
| Triglyceride (mmol/L)          | 1.18 [0.89, 1.62]     | 1.29 [0.92, 1.64]     | 1.08 [0.81, 1.28]     | 1.10 [0.83, 1.54]     | 1.17 [0.91, 1.57]      | 1.54 [1.08, 2.05]       | 1.21 [0.89, 1.62]     | 1.25 [0.96, 1.68]     | 1.36 [1.03, 2.01]     | <b>&lt;0.0001</b>    |
| Resting heart rate (beats/min) | 59 [53, 66]           | 58.50 [52, 65]        | 56 [50, 62.50]        | 57 [52, 64]           | 58 [53, 64]            | 64 [58, 76]             | 62 [56, 67]           | 61 [54, 68]           | 60 [54.50, 68]        | <0.0001              |
| NYHA (%)                       |                       |                       |                       |                       |                        |                         |                       |                       |                       |                      |
| NYHA Class I                   | 689 (44.5)            | 31 (36.0)             | 15 (41.7)             | 220 (34.1)            | 55 (40.1)              | 45 (57.0)               | 21 (55.3)             | 259 (56.4)            | 43 (62.3)             | <0.0001              |
| NYHA Class II                  | 52 (3.3)              | 2 (2.3)               | 0 (0.0)               | 19 (3)                | 4 (2.9)                | 8 (10.2)                | 4 (10.5)              | 13 (2.9)              | 2 (2.9)               |                      |
| Medication (%)                 |                       |                       |                       |                       |                        |                         |                       |                       |                       |                      |
| ARBs                           | 438 (28.0)            | 20 (23.0)             | 12 (33.3)             | 162 (24.8)            | 39 (28.3)              | 20 (25.0)               | 14 (36.8)             | 146 (31.7)            | 25 (36.2)             | 0.0092               |
| ACEIs                          | 631 (40.4)            | 31 (35.6)             | 17 (47.2)             | 253 (38.7)            | 55 (39.9)              | 32 (40.0)               | 13 (34.2)             | 199 (43.2)            | 31 (44.9)             | 0.1772               |
| CCBs                           | 373 (23.8)            | 17 (19.5)             | 16 (44.4)             | 122 (18.7)            | 20 (14.5)              | 18 (22.5)               | 19 (50.0)             | 135 (29.2)            | 26 (37.7)             | <0.0001              |
| Diuretics                      | 515 (32.9)            | 23 (26.4)             | 13 (36.1)             | 159 (24.3)            | 33 (23.9)              | 27 (33.8)               | 24 (63.2)             | 205 (44.4)            | 31 (44.9)             | <0.0001              |
| β-blockers                     | 1360 (87.0)           | 68 (78.2)             | 33 (91.7)             | 575 (87.9)            | 119 (86.2)             | 64 (80.0)               | 33 (86.8)             | 406 (87.9)            | 62 (89.9)             | 0.9815               |
| Lipid-lowering therapy         | 1397 (89.3)           | 0 (0.0)               | 36 (100.0)            | 654 (100.0)           | 138 (100.0)            | 0 (0.0)                 | 38 (100.0)            | 462 (100.0)           | 69 (100.0)            | 0.0900               |
| History (%)                    |                       |                       |                       |                       |                        |                         |                       |                       |                       |                      |
| Prior MI                       | 754 (48.2)            | 29 (33.3)             | 14 (38.9)             | 315 (48.2)            | 85 (61.6)              | 30 (37.5)               | 16 (42.1)             | 226 (48.9)            | 39 (56.5)             | 0.8872               |
| Prior PCI or CABG              | 1236 (79.2)           | 49 (57.6)             | 25 (69.4)             | 528 (81.0)            | 125 (90.6)             | 50 (62.5)               | 31 (81.6)             | 365 (79.0)            | 63 (91.3)             | 0.5511               |
| Smoking                        | 131 (8.4)             | 8 (9.2)               | 2 (5.6)               | 34 (5.2)              | 10 (7.2)               | 13 (16.5)               | 7 (18.4)              | 49 (10.6)             | 8 (11.6)              | <0.0001              |
| Death (%)                      |                       |                       |                       |                       |                        |                         |                       |                       |                       |                      |
| All-cause mortality            | 165 (10.5)            | 9 (10.3)              | 3 (8.3)               | 38 (5.8)              | 6 (4.3)                | 17 (21.2)               | 8 (21.1)              | 82 (17.7)             | 2 (2.9)               | <0.0001              |
| Cardiovascular Death           | 91 (5.8)              | 6 (6.9)               | 1 (2.8)               | 24 (3.7)              | 2 (1.4)                | 14 (17.5)               | 5 (13.2)              | 37 (8.0)              | 2 (2.9)               | <0.0001              |
| non-Cardiovascular Death       | 75 (4.8)              | 3 (3.4)               | 2 (5.6)               | 15 (2.3)              | 4 (2.9)                | 4 (5.0)                 | 3 (7.9)               | 44 (9.5)              | 0 (0.0)               |                      |
| Sudden Cardiac Death           | 34 (2.2)              | 2 (2.3)               | 1 (2.8)               | 9 (1.4)               | 1 (0.7)                | 3 (3.8)                 | 3 (7.9)               | 15 (3.2)              | 0 (0.0)               | <0.0001              |

Values were expressed as mean ± SD, median [IQR], or counts (%) as appropriate. T2D, type 2 diabetes; LVEF, left ventricular ejection fraction; BMI, body mass index; sysBP, systolic blood pressure; diaBP, diastolic blood pressure; BNP, B-type natriuretic peptide; %GHbA1C, percentage of glycated hemoglobin A1c; HDL, high-density lipoprotein; LDL, low-density lipoprotein; NYHA, New York Heart Association Classification; ARBs, Angiotensin II receptor blocker; ACEIs, Angiotensin-Converting Enzyme Inhibitors ; β-blockers, β-adrenergic blockers; CCBs, calcium channel blockers; MI, myocardial infarction; CABG, coronary artery bypass surgery; PCI, percutaneous coronary intervention. ET-1, endothelin-1.
